# Supplementary material for: Effects of Phenolic-Rich Pinus densiflora Extract on Learning, Memory, and Hippocampal Long-Term Potentiation in Scopolamine-Induced Amnesic Rats
Source: MDPI journal article supplement (doi:10.3390/antiox11122497), 2022-12-19
Supplement: s1 [file s1]

Supplementary Files

# Effects of Phenolic-rich *Pinus densiflora* Extract on Learning, Memory, and Hippocampal Long-term Potentiation in Scopolamine-induced Amnesic Rats

Kwan Joong Kim<sup>1</sup>, Eun-Sang Hwang<sup>2</sup>, Min-Jeong Kim<sup>3</sup>, Chan-Su Rha<sup>4</sup>, Myoung Chong Song<sup>5</sup>, Sungho Maeng<sup>2</sup>, Ji-Ho Park<sup>2\*</sup> and Dae-Ok Kim<sup>1,3\*</sup>

<sup>1</sup> Graduate School of Biotechnology, Kyung Hee University, Yongin 17104, Republic of Korea

<sup>2</sup> Graduate School of East-West Medical Science, Kyung Hee University, Yongin 17104, Republic of Korea

<sup>3</sup> Department of Food Science and Biotechnology, Kyung Hee University, Yongin 17104, Republic of Korea

<sup>4</sup> AMOREPACIFIC R&I Center, Yongin 17074, Republic of Korea

<sup>5</sup> Natural Products Research Institute, College of Pharmacy, Seoul National University, Seoul 08826, Republic of Korea

\* Correspondence: jihopark@khu.ac.kr; Tel: +82-31-201-2916 (J.-H.P); DOKIM05@khu.ac.kr; Tel: +82-31-201-3796 (D.-O.K.)

## Table of Contents

### 1. Materials and methods

#### 1.1. Determination of total phenolic and flavonoid content

#### 1.2. Determination of antioxidant capacity

### 2. Results and discussion

#### 1.1. Total phenolic and flavonoid content

#### 2.2. Antioxidant capacity

Table S1. Total phenolic and flavonoid content, and antioxidant capacity of *Pinus densiflora* Sieb. et Zucc. bark extract (PBE)

Figure S1. (A) Total ion chromatogram and (B) base peak chromatogram (filtered with MS<sup>1</sup>) of *Pinus densiflora* Sieb. et Zucc. bark extract (PBE)

Figure S2. Typical fragmentation patterns for procyanidins (A) dimer and (B) trimer.

Figure S3. Typical fragmentation patterns for (A) 3-*p*-coumaroylquinic acid and (B) 5-*p*-coumaroylquinic acid.

Figure S4. Typical fragmentation patterns for (A) quercetin 3-*O*-rhamnoside and (B) quercetin-7-*O*-glucoside.

Figure S5. Typical fragmentation patterns for (A) procyanidin B type dimer and (B) procyanidin trimer via retro-Diels-Alder (RDA), heterocyclic ring fission (HRF), and quinone methide (QM) reactions.

Figure S6. MS<sup>2</sup> characteristics of *O*-glycosylated hydroxyflavonol.

Figure S7. Swimming time in each quadrant of trial acquisition in the Morris water maze test. The removed target platform (rTP) is located in target quadrant 3. Quadrants: Q1, quadrant 1; Q2, quadrant 2; Q3, quadrant; Q4 quadrant 4

## 1. Materials and methods

### 1.1. Determination of total phenolic and flavonoid content

The total phenolic content of the *Pinus densiflora* Sieb. et Zucc. bark extract (PBE) was measured using the colorimetric method with Folin-Ciocalteu's phenol reagent [1]. Two hundred microliters of PBE (100 mg/L) was mixed with 2.6 mL of deionized water. Then, 200  $\mu$ L of Folin-Ciocalteu's phenol reagent was added to the mixture. At 6 min, 2 mL of 7% (*w/v*)  $\text{Na}_2\text{CO}_3$  solution was added; at 90 min, the absorbance was measured at 750 nm using a spectrophotometer (SPECTRONIC 200; Thermo Fisher Scientific Inc., Waltham, MA, USA). The content of total phenolics was expressed as mg gallic acid equivalents (GAE)/g extract.

The total flavonoid content of the PBE was measured using the method of [2]. Five hundred microliters of PBE (100 mg/L) was mixed with 3.2 mL of deionized water. Then, 150  $\mu$ L of 5% (*w/v*)  $\text{NaNO}_2$  solution was added. After 5 min, 150  $\mu$ L of 10% (*w/v*)  $\text{AlCl}_3$  was added. At 6 min, 1 mL of 1 M NaOH was added, and absorbance was measured immediately using a spectrophotometer (SPECTRONIC 200; Thermo Fisher Scientific Inc.). The content of total flavonoids was expressed as mg catechin equivalents (CE)/g extract.

### 1.2. Determination of antioxidant capacity

The antioxidant capacity of PBE was determined using the ABTS and DPPH radicals [3] and expressed in mg vitamin C equivalents (VCE)/g extract. The ABTS radical solution was adjusted to an absorbance of  $0.650 \pm 0.020$  at 734 nm using a spectrophotometer (SPECTRONIC 200; Thermo Fisher Scientific Inc.). The reaction between ABTS radicals and the PBE (100 mg/L) was allowed to proceed at 37°C for 10 min, and then the decrease in absorbance of the resulting solution was measured at 734 nm using a spectrophotometer (SPECTRONIC 200; Thermo Fisher Scientific Inc.). For the assay using DPPH radicals, the absorbance of DPPH radicals in 80% (*v/v*) aqueous methanol was set to  $0.650 \pm 0.020$  at 517 nm using a spectrophotometer (SPECTRONIC 200; Thermo Fisher Scientific Inc.). DPPH radicals and PBE (100 mg/L) were reacted together at 23°C for 30 min. The absorbance of the resulting solution was monitored at 517 nm using a spectrophotometer (SPECTRONIC 200; Thermo Fisher Scientific Inc.).

## 2. Results and discussion

### 2.1. Total phenolic and flavonoid content

The total phenolic content of PBE was approximately 433.4 mg GAE/g (Table S1), which is similar to those of other bark extracts of *Pinus* species; 360.8 mg GAE/g for *P. pinaster* (maritime pine) [4], 550 mg GAE/g for *P. radiata* [5], and 299.3 mg GAE/g for *P. cembra* [6].

The total flavonoid content of PBE was approximately 299.4 mg CE/g (Table S1), which is similar to those of other bark extracts of the *Pinus* species; 379 mg CE/g for *P. durangensis* [7], 403 mg CE/g for *P. pinaster* [8], and 125.3 mg CE/g for *P. cembra* [6].

## 2.2. Antioxidant capacity

The antioxidant activities of PBE were approximately 540.5 and 402.6 mg VCE/g in the ABTS and DPPH assays, respectively (Table S1). A previous study showed that the bark of *P. densiflora* had a higher radical scavenging activity than the bark of *P. thunbergii* and *P. pinaster* (Pycnogenol®) in the ABTS assay [9]. Also, the results in this study were similar to those of another extract of *P. densiflora* bark extract (PineXol®) showing 697.3 mg VCE/g in the ABTS assay and 521.8 mg VCE/g in the DPPH assay [10]. The antioxidant capacity of PBE was due to phenolics in PBE such as procyanidins and their building blocks [(+)-catechin and (-)-epicatechin], and taxifolin and its derivatives, which were reported to have strong antioxidant capacities [11–14].

**Table S1**

Total phenolic and flavonoid content, and antioxidant capacity of *Pinus densiflora* Sieb. et Zucc. bark extract (PBE)

|     | Total phenolic content<br>(mg gallic acid equiv./g) | Total flavonoid content<br>(mg catechin equiv./g) | Antioxidant capacity<br>(mg vitamin C equiv./g) |                   |
|-----|-----------------------------------------------------|---------------------------------------------------|-------------------------------------------------|-------------------|
|     |                                                     |                                                   | ABTS <sup>a</sup>                               | DPPH <sup>b</sup> |
| PBE | 433.4 ± 9.0 <sup>c</sup>                            | 299.4 ± 11.3                                      | 540.5 ± 8.2                                     | 402.6 ± 22.9      |

<sup>a</sup> 2,2-Azino-bis(3-ethylbenzothiazoline-6-sulfonic acid) radical scavenging assay

<sup>b</sup> 2,2-Diphenyl-1-picrylhydrazyl radical scavenging assay

<sup>c</sup> Data are expressed as means ± standard deviations (n = 3)

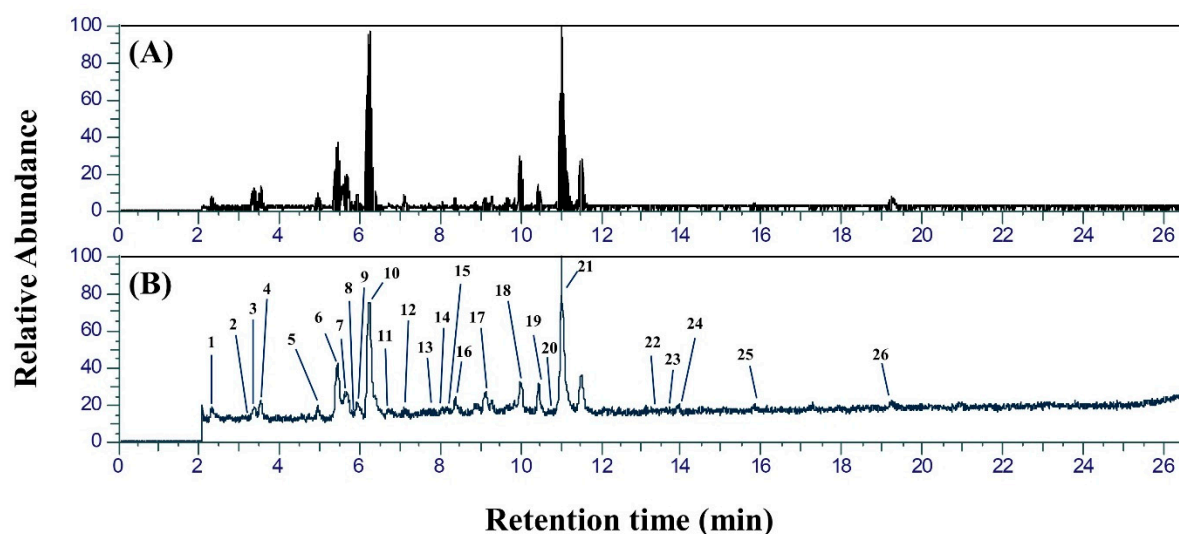

Figure S1. (A) Total ion chromatogram and (B) base peak chromatogram (filtered with MS<sup>1</sup>) of *Pinus densiflora* Sieb. et Zucc. bark extract (PBE). Peaks: 1, procyanidin trimer; 2, hydroxymandelic acid; 3, syringaldehyde; 4, protocatechuic acid; 5, unknown; 6, 3-*p*-coumaroylquinic acid; 7, procyanidin B1; 8, procyanidin B3; 9, procyanidin trimer; 10, (+)-catechin; 11, procyanidin trimer; 12, caffeic acid; 13, 5-*p*-coumaroylquinic acid; 14, (–)-epicatechin; 15, procyanidin trimer; 16, vanillyl ethyl ester hexoside; 17, procyanidin B2; 18, taxifolin 3-*O*-glucoside; 19, unknown; 20, luteolin; 21, taxifolin; 22, taxifolin isomer; 23, quercetin 3-*O*-rhamnoside; 24, dehydroxytaxifolin; 25, quercetin 7-*O*-glucoside; 26, quercetin.

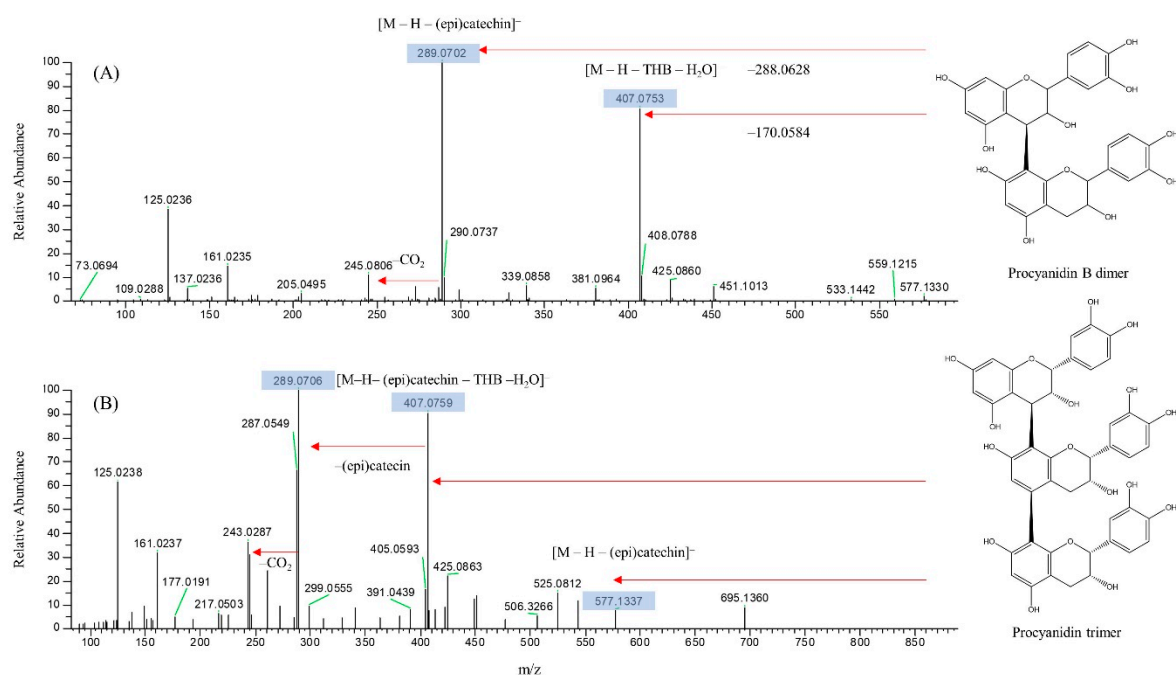

Figure S2. Typical fragmentation patterns for procyanidins (A) dimer and (B) trimer. The highlight  $m/z$  is characteristic  $\text{MS}^2$  fragment ions.

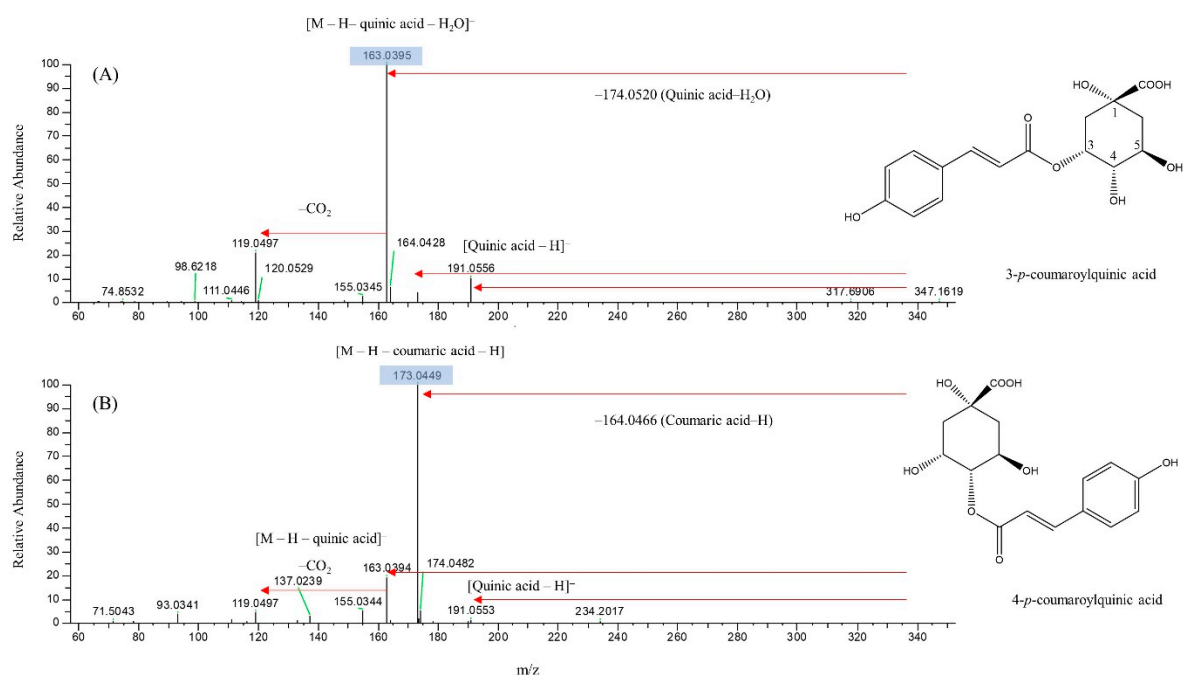

Figure S3. Typical fragmentation patterns for (A) 3-*p*-coumaroylquinic acid and (B) 5-*p*-coumaroylquinic acid. The highlight  $m/z$  is characteristic  $\text{MS}^2$  fragment ions.

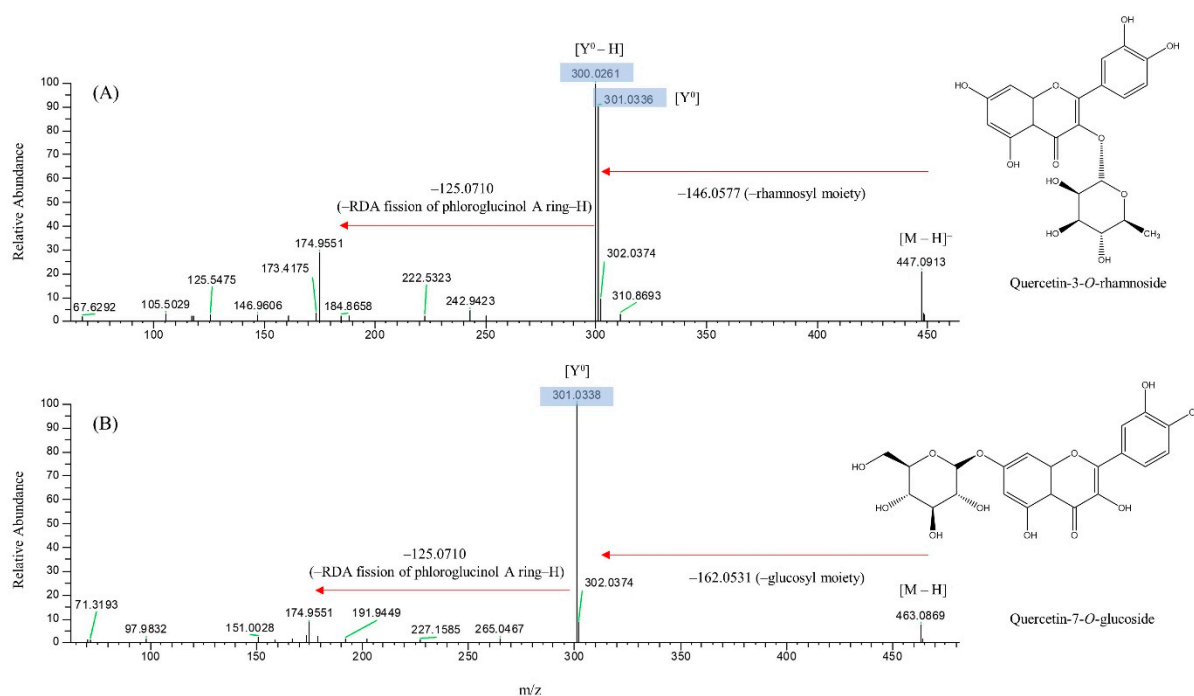

Figure S4. Typical fragmentation patterns for (A) quercetin 3-O-rhamnoside and (B) quercetin 7-O-glucoside. The highlight  $m/z$  is characteristic MS<sup>2</sup> fragment ions.

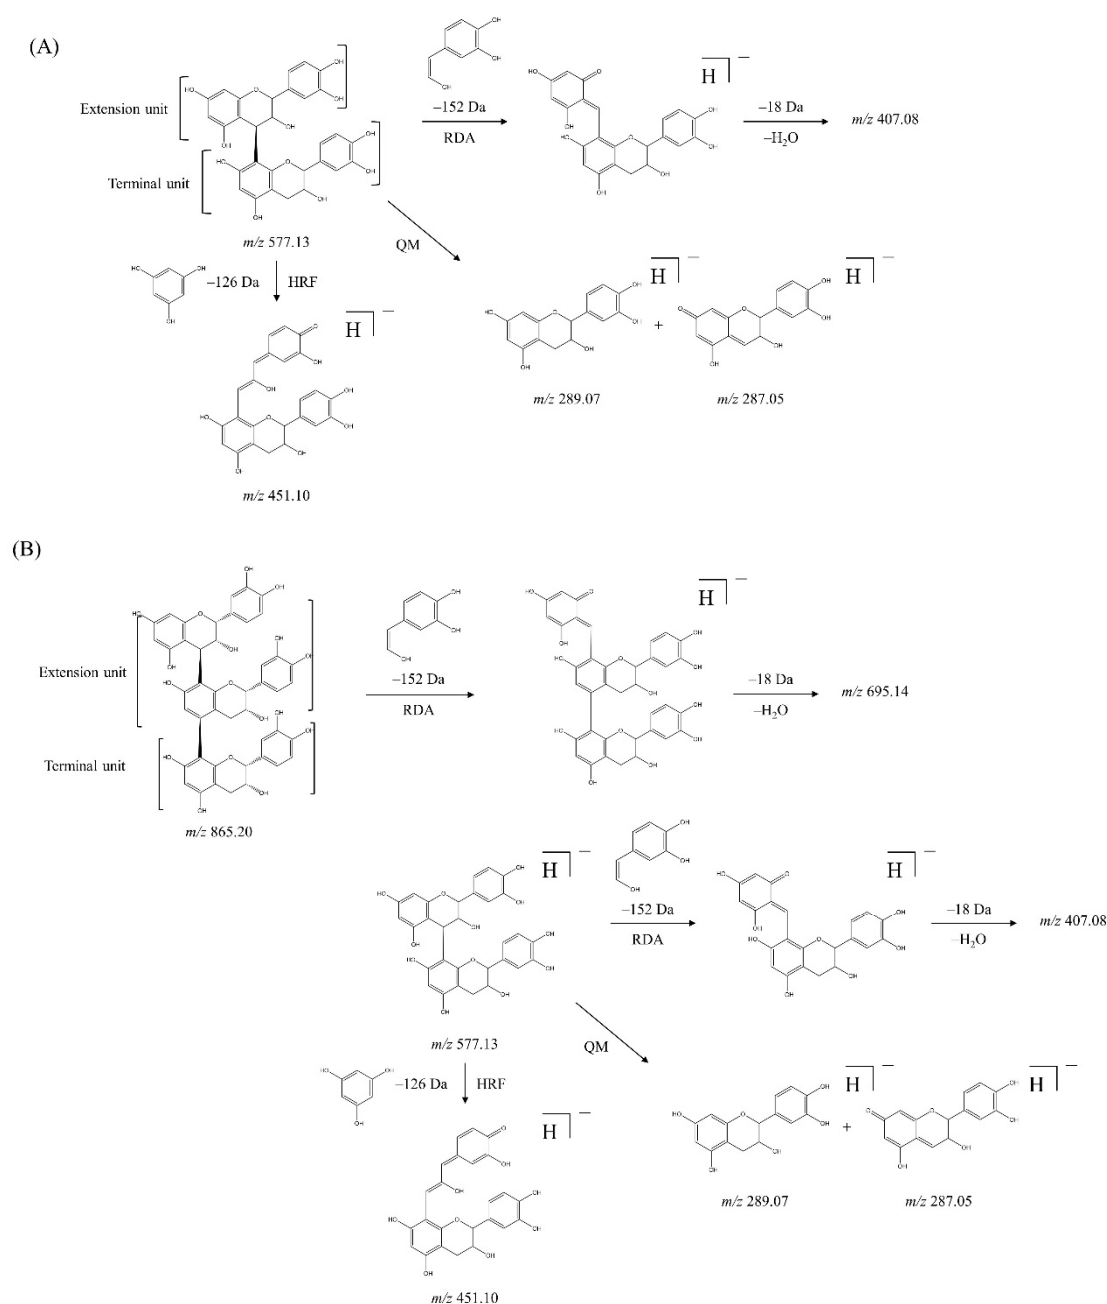

Figure S5. Typical fragmentation patterns for (A) procyanidin B type dimer and (B) procyanidin trimer via retro-Diels-Alder (RDA), heterocyclic ring fission (HRF), and quinone methide (QM) reactions.



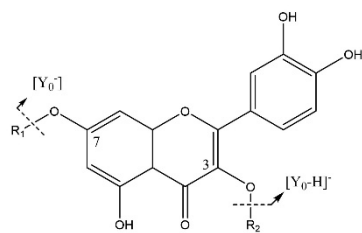

Figure S6. MS<sup>2</sup> characteristics of O-glycosylated hydroxyflavonol.

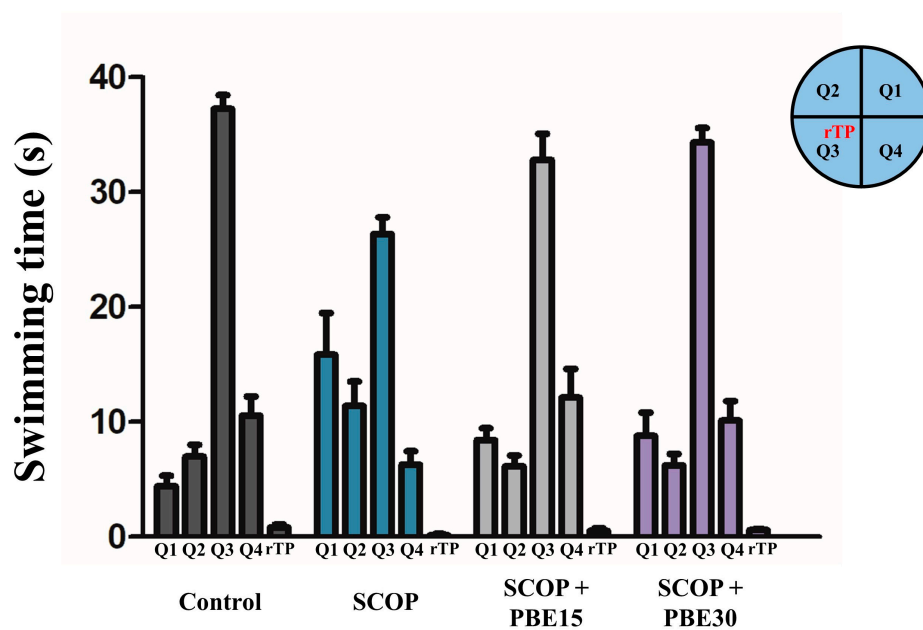

Figure S7. Swimming time in each quadrant of trial acquisition in the Morris water maze test. The removed target platform (rTP) is located in target quadrant 3. Quadrants: Q1, quadrant 1; Q2, quadrant 2; Q3, quadrant; Q4 quadrant 4.
